# Supplementary material
Source: Springer Nature journal article supplement (https://www.springermedizin.de/resource/supplementary/13058_2012_3231_MOESM7_ESM.pdf/9703566)

**A****MCF7**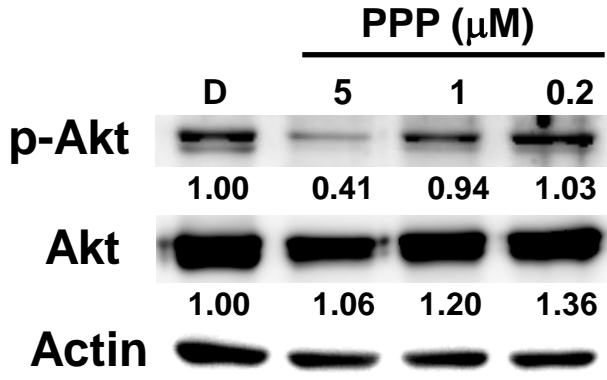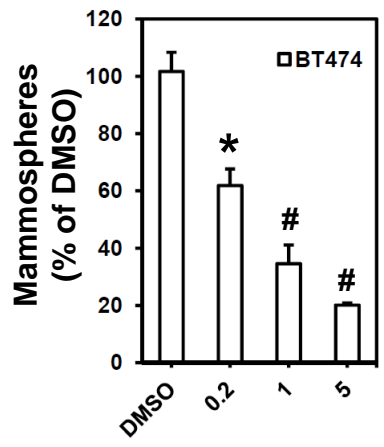**BT474**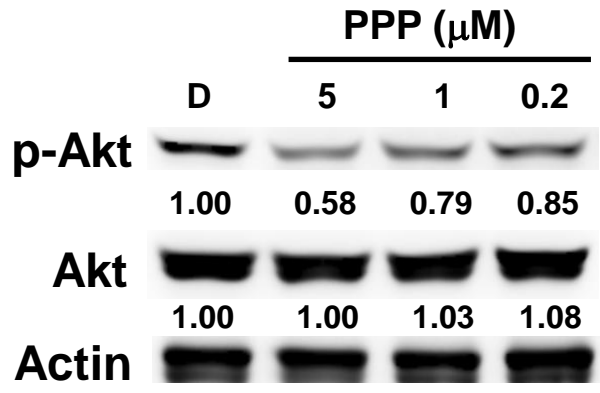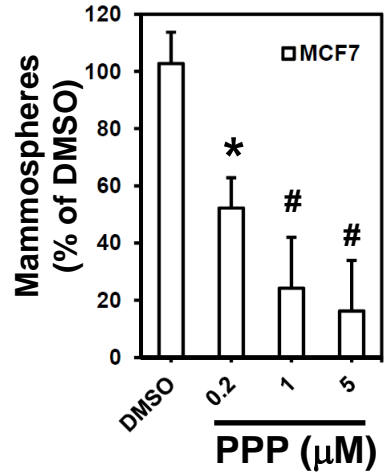**B**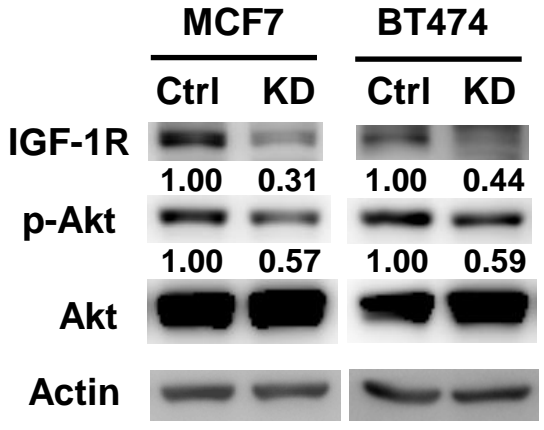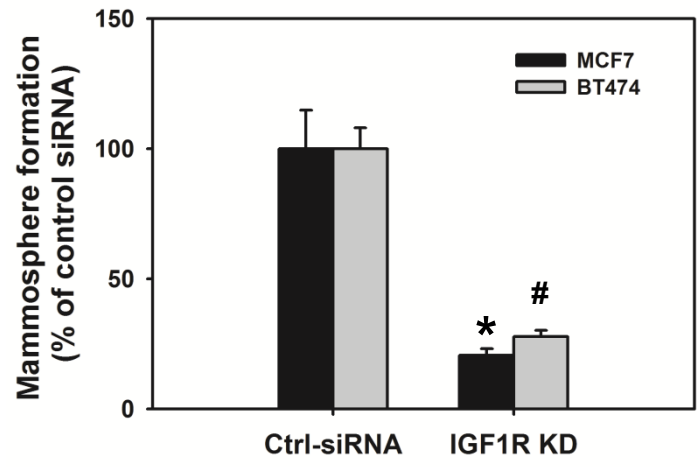

Supplement: MOESM7 [file 9703566]
